# Supplementary material for: Management of cardiovascular disease using an mHealth tool: a randomized clinical trial
Source: PubMed Central journal article supplement (PMC8642390; doi:10.1038/s41746-021-00535-z), 2021-12-03
Supplement: 41746_2021_535_MOESM1_ESM.pdf [file 41746_2021_535_MOESM1_ESM.pdf]

**Supplementary Figure 1. Pre-planned subgroup analysis**

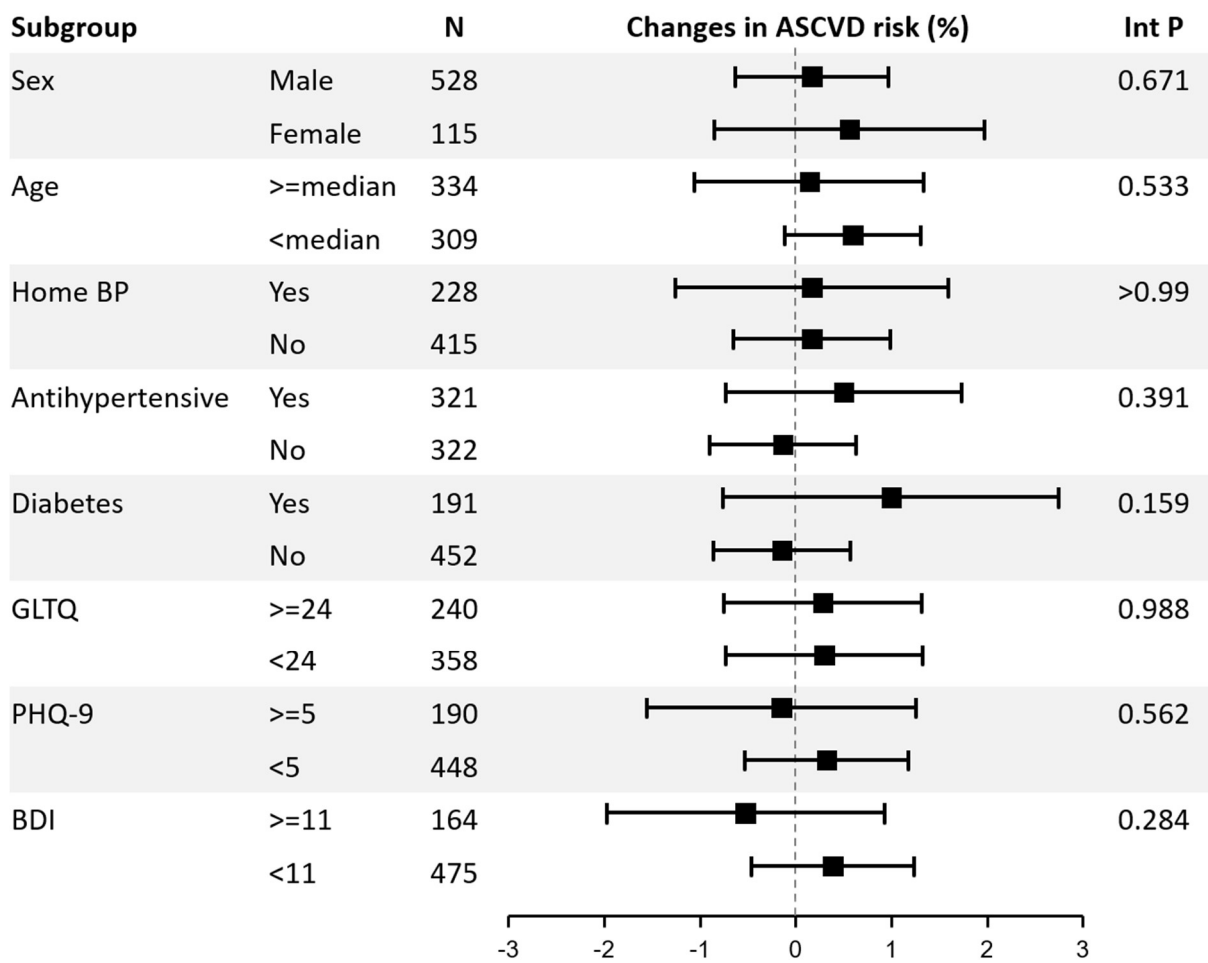

Abbreviations: BP, blood pressure; GLTQ, Godin Leisure-Time Exercise Questionnaire; PHQ-9, Patient Health Questionnaire-9; BDI, Beck depression inventory

Supplementary Figure 2. User experience survey results

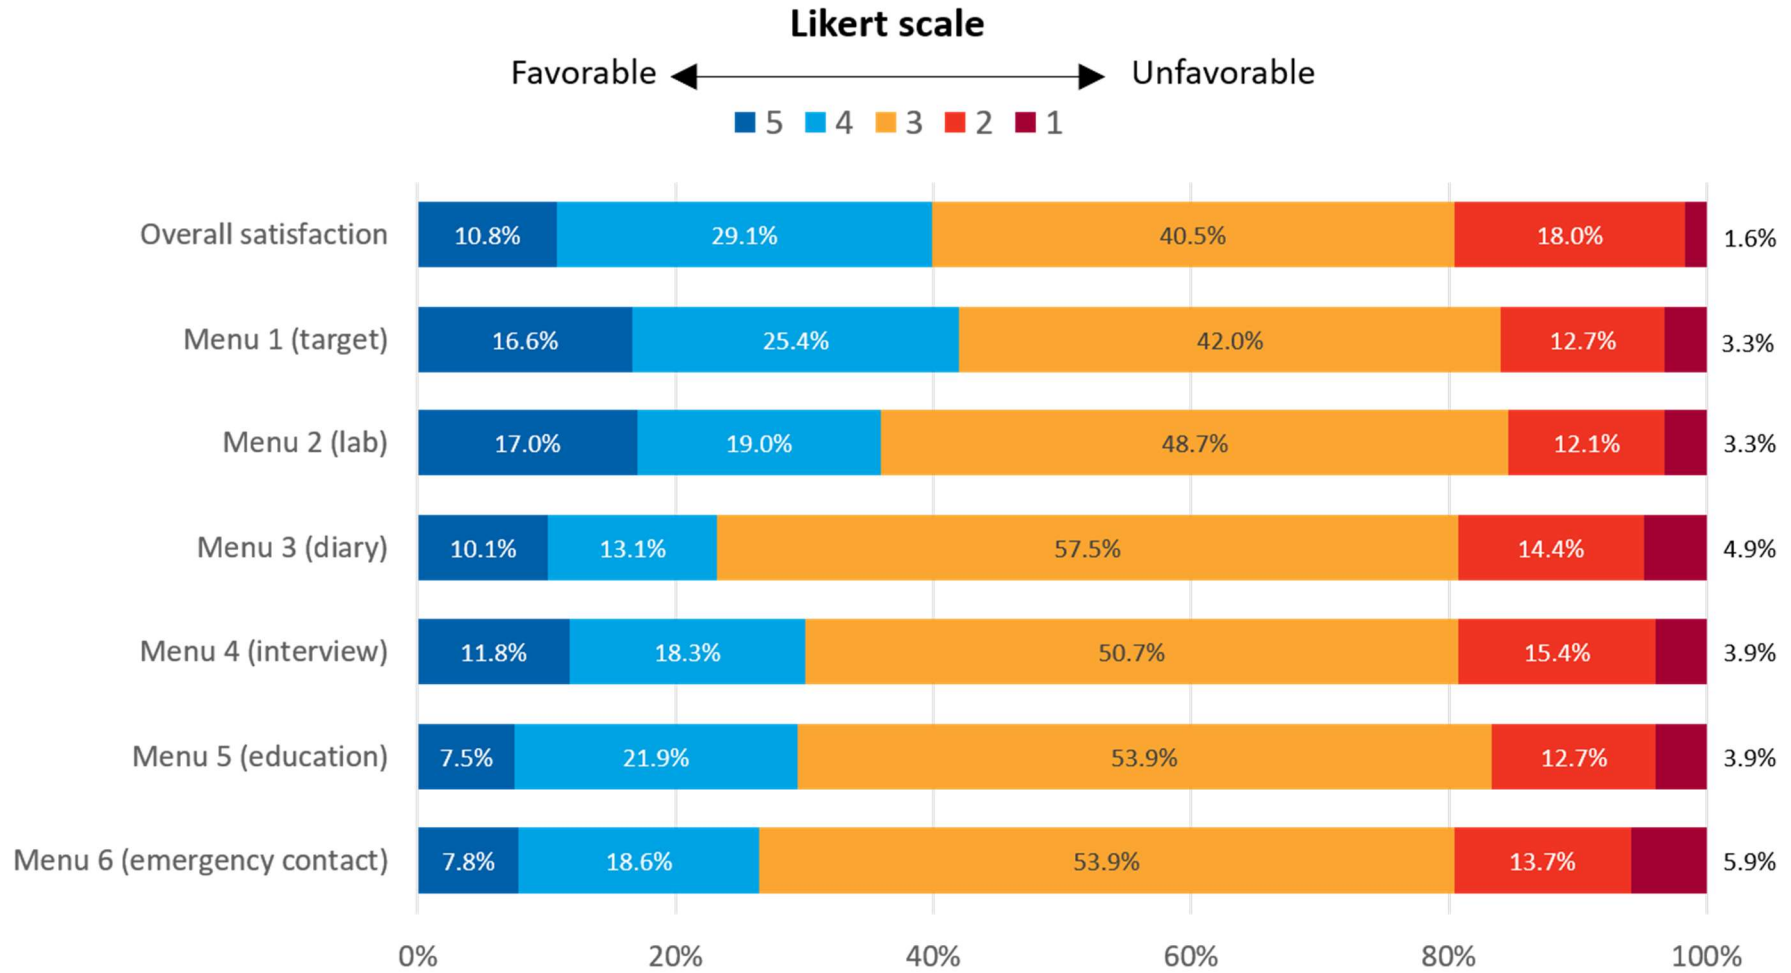

### Supplementary Figure 3. User interface for patients

(A) Main screen, (B) target goals, (C) blood pressure input, (D) prescribed medications, (E) estimated 10-year cardiovascular event risk, (F) symptom diary, (G) self-administered questionnaires, (H) education contents, and (I) interface for treating physicians

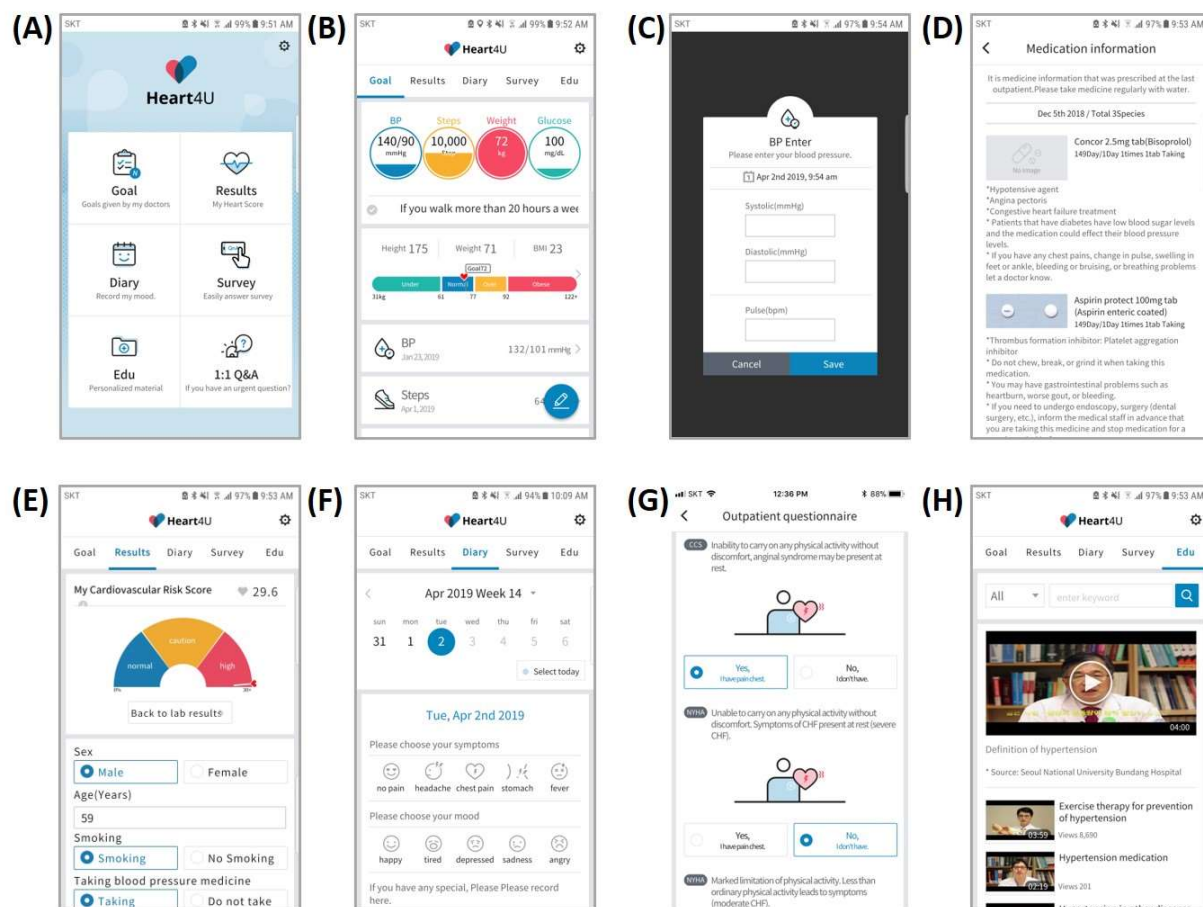

Supplementary Figure 4. User interface for patients physicians integrated into the electronic health record system

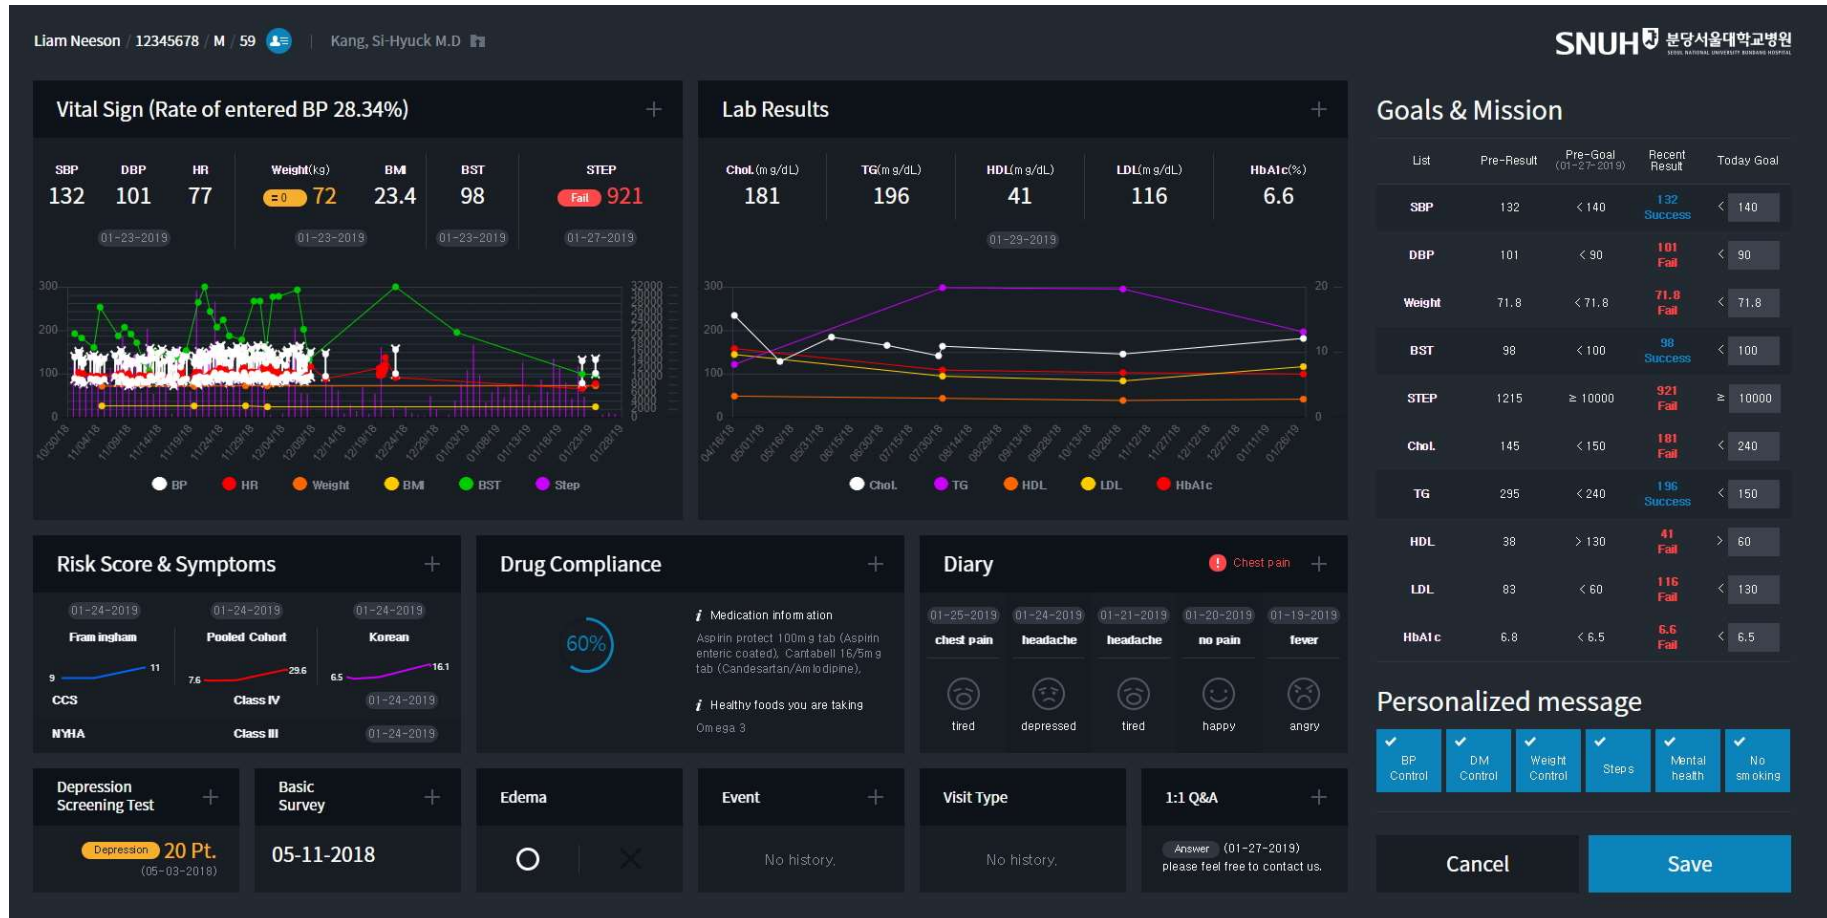

**Supplementary Figure 5.** Research model for patients' acceptance of the mHealth app

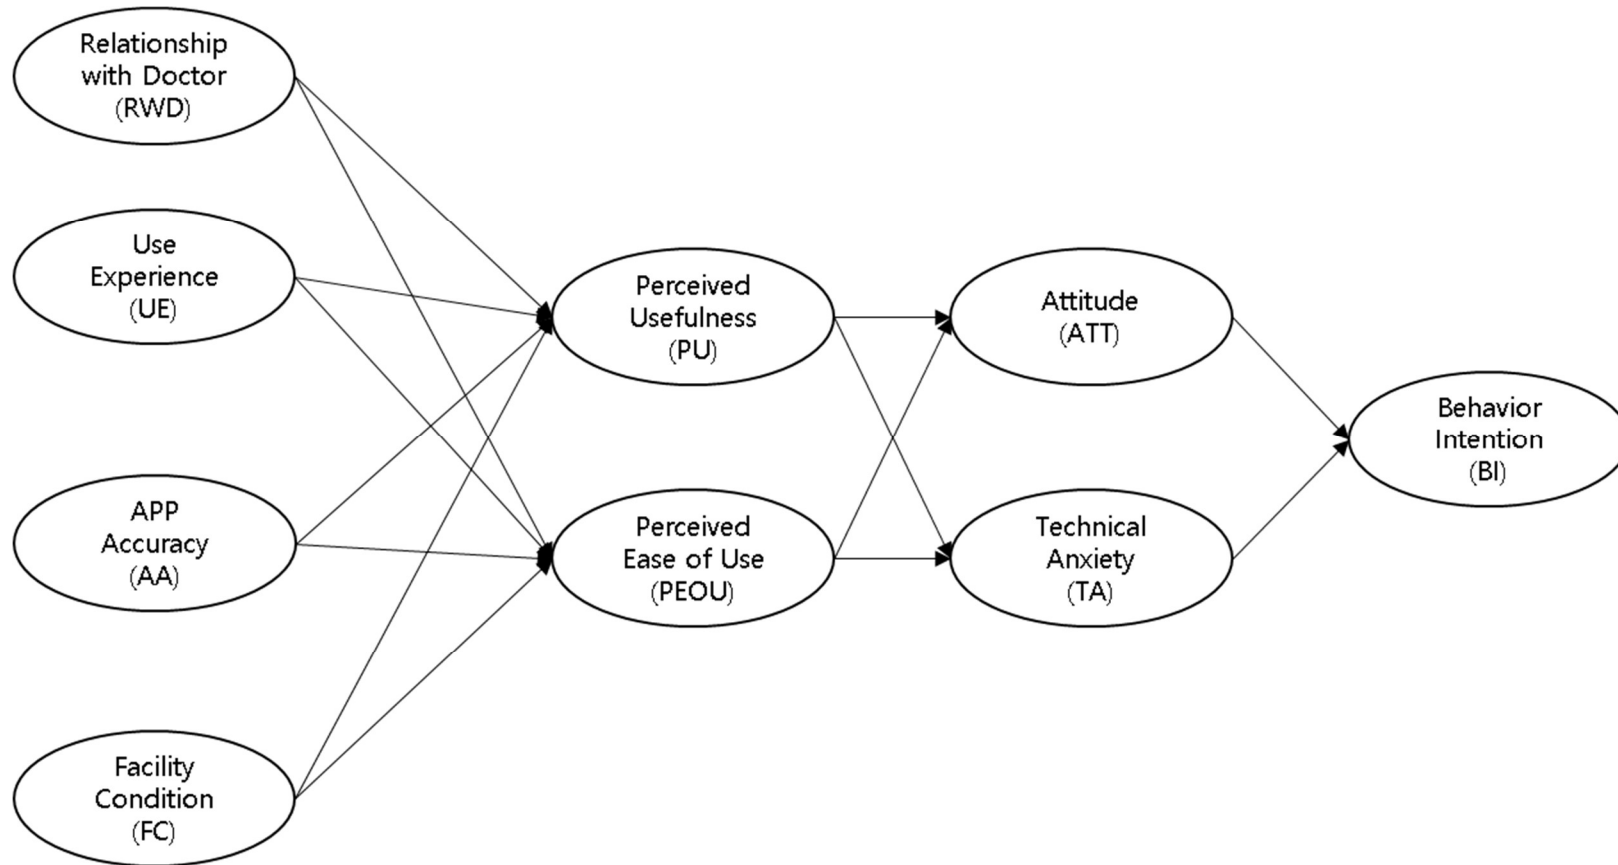

**Supplementary Figure 6.** Participants analyzed for structural equation model

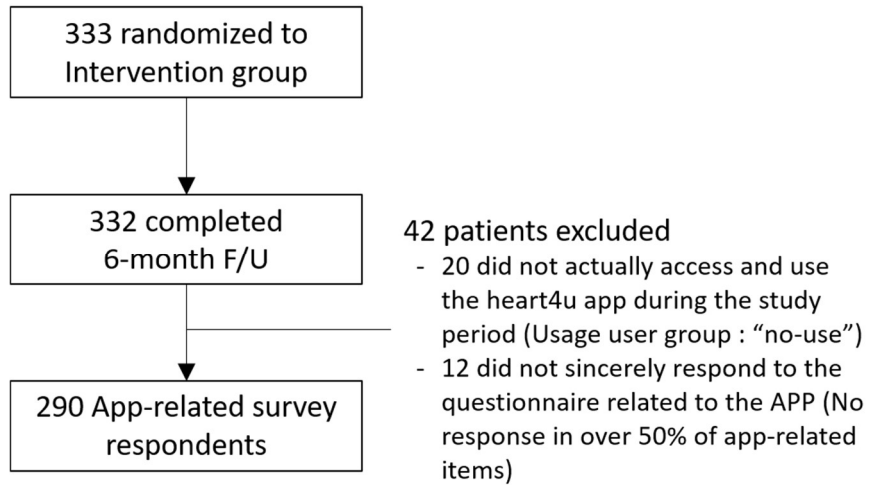

## Supplementary Table 1. Inclusion and exclusion criteria

---

### Inclusion criteria

---

1. Age between 30 and 79 years
2. Clinical atherosclerotic cardiovascular disease defined by any of the followings:
  - 1) History of acute myocardial infarction, unstable angina, or angina pectoris
  - 2) History of arterial revascularization therapy including coronary intervention, coronary artery bypass surgery, and peripheral artery angioplasty or surgery
  - 3) history of stroke
  - 4) peripheral arterial disease presumed to be of atherosclerotic origin.
3. Possession of a mobile smartphone where the study app can be installed,
4. Sufficient Korean language skills to provided informed consent and understand the operation of smartphone apps.

---

### Exclusion criteria

---

1. Cardiovascular disease of non-atherosclerotic origin
  2. Cognitive impairment such as dementia, delirium, and amnesic disorder
  3. Difficulty in using smartphone apps
  4. Other reasons for which researchers determine participating in the study difficult.
-

**Supplementary Table 2. Study endpoints**

| <b>Endpoints</b>                                | <b>Measurement</b>                                                                                                       | <b>Time frame</b>              |
|-------------------------------------------------|--------------------------------------------------------------------------------------------------------------------------|--------------------------------|
| Primary endpoint                                |                                                                                                                          |                                |
| Change of predicted 10-year cardiovascular risk | Pooled cohort equations                                                                                                  | 6 (±2) months                  |
| Secondary endpoints                             |                                                                                                                          |                                |
| Systolic and diastolic blood pressure           | Automated blood pressure measurements (mmHg)                                                                             | 3 (±1) months<br>6 (±2) months |
| Lipid profiles                                  | Total cholesterol (mg/dL)<br>Low-density lipoprotein cholesterol (mg/dL)<br>High-density lipoprotein cholesterol (mg/dL) | 6 (±2) months                  |
| Body mass index                                 | Weight divided by (height) <sup>2</sup> (kg/m <sup>2</sup> )                                                             | 6 (±2) months                  |
| Smoking status,                                 | Proportion of active smoking (%)                                                                                         | 6 (±2) months                  |
| Physical activity                               | Godin Leisure-Time Exercise Questionnaire, total score (0–7)                                                             | 6 (±2) months                  |
| Depression severity                             | Patient Health Questionnaire-9 (PHQ-9), total score 27 (0–27)                                                            | 6 (±2) months                  |
| Medication adherence                            | Medication Adherence Rating Scale (MARS), total score 10 (0–10)                                                          | 6 (±2) months                  |
| Overall satisfaction survey over the app        | Patient Activation Measure-13, total score 39 (0–39)                                                                     | 6 (±2) months                  |



**Supplementary Table 3.** Evaluation result of the measurement model (reliability and convergent validity)

| lhs  | op | rhs        | est.std | est   | se    | z       | pvalue | ci.lower | ci.upper | alpha | omega | avevar |
|------|----|------------|---------|-------|-------|---------|--------|----------|----------|-------|-------|--------|
| RWD  | =~ | APP_B_9_1  | 0.978   | 1.013 | 0.016 | 62.548  | 0      | 0.948    | 1.009    |       |       |        |
| RWD  | =~ | APP_B_9_2  | 0.863   | 0.889 | 0.021 | 41.963  | 0      | 0.822    | 0.903    | 0.915 | 0.92  | 0.851  |
| UE   | =~ | APP_B_5_1  | 0.94    | 1.01  | 0.020 | 47.11   | 0      | 0.901    | 0.979    |       |       |        |
| UE   | =~ | APP_B_5_2  | 0.858   | 0.904 | 0.023 | 36.798  | 0      | 0.812    | 0.904    | 0.893 | 0.895 | 0.811  |
| AA   | =~ | APP_B_13_1 | 0.917   | 0.822 | 0.017 | 52.739  | 0      | 0.882    | 0.951    |       |       |        |
| AA   | =~ | APP_B_13_2 | 0.875   | 0.803 | 0.020 | 44.238  | 0      | 0.836    | 0.913    | 0.890 | 0.890 | 0.802  |
| FC   | =~ | APP_B_6_1  | 0.866   | 0.963 | 0.020 | 44.443  | 0      | 0.828    | 0.904    |       |       |        |
| FC   | =~ | APP_B_6_2  | 0.916   | 0.935 | 0.016 | 57.016  | 0      | 0.884    | 0.947    | 0.822 | 0.841 | 0.648  |
| FC   | =~ | APP_B_6_3  | 0.580   | 0.593 | 0.043 | 13.539  | 0      | 0.496    | 0.664    |       |       |        |
| PU   | =~ | APP_B_1_1  | 0.938   | 0.885 | 0.010 | 91.934  | 0      | 0.918    | 0.958    |       |       |        |
| PU   | =~ | APP_B_1_2  | 0.922   | 0.873 | 0.012 | 79.346  | 0      | 0.899    | 0.944    | 0.939 | 0.940 | 0.839  |
| PU   | =~ | APP_B_1_3  | 0.886   | 0.822 | 0.015 | 58.838  | 0      | 0.856    | 0.915    |       |       |        |
| PEOU | =~ | APP_B_2_1  | 0.932   | 0.948 | 0.009 | 100.666 | 0      | 0.914    | 0.950    |       |       |        |
| PEOU | =~ | APP_B_2_2  | 0.969   | 1.000 | 0.006 | 160.989 | 0      | 0.957    | 0.981    | 0.965 | 0.965 | 0.902  |
| PEOU | =~ | APP_B_2_3  | 0.947   | 0.956 | 0.008 | 121.271 | 0      | 0.932    | 0.963    |       |       |        |
| ATT  | =~ | APP_B_3_1  | 0.903   | 0.926 | 0.013 | 67.437  | 0      | 0.877    | 0.930    |       |       |        |
| ATT  | =~ | APP_B_3_2  | 0.928   | 0.952 | 0.011 | 83.202  | 0      | 0.906    | 0.949    | 0.928 | 0.929 | 0.813  |
| ATT  | =~ | APP_B_3_3  | 0.873   | 0.893 | 0.016 | 53.381  | 0      | 0.841    | 0.905    |       |       |        |
| TA   | =~ | APP_B_7_1  | 0.890   | 0.898 | 0.018 | 48.086  | 0      | 0.854    | 0.926    |       |       |        |
| TA   | =~ | APP_B_7_2  | 0.950   | 1.020 | 0.016 | 61.252  | 0      | 0.920    | 0.981    | 0.887 | 0.894 | 0.740  |
| TA   | =~ | APP_B_7_3  | 0.728   | 0.778 | 0.031 | 23.51   | 0      | 0.667    | 0.788    |       |       |        |
| BI   | =~ | APP_B_14_1 | 0.988   | 1.049 | 0.006 | 158.222 | 0      | 0.976    | 1.000    |       |       |        |
| BI   | =~ | APP_B_14_2 | 0.958   | 1.021 | 0.008 | 124.701 | 0      | 0.943    | 0.973    | 0.973 | 0.973 | 0.947  |

**Supplementary Table 4.** Evaluation results of the model fit

| <b>Model fit Criteria</b>                              | <b>Proposed model value</b> |
|--------------------------------------------------------|-----------------------------|
| Chi-square(X2) $p < 0.05$                              | <0.001                      |
| Standardized RMR (SRMR) $< 0.1$                        | 0.066                       |
| Root Mean Square Error of Approximation(RMSEA) $< 0.1$ | 0.088                       |
| Comparative Fit Index (CFI) $> 0.9$                    | 0.935                       |
| Normed Fix Index (NFI) $> 0.9$                         | 0.907                       |
| Tucker-Lewis Index (TLI) $> 0.9$                       | 0.922                       |

**Supplementary Table 5.** Factors affecting the intention to use of the app evaluated using the structural equation

|             | <b>RWD</b> | <b>UE</b> | <b>AA</b> | <b>FC</b> | <b>PU</b> | <b>PEOU</b> | <b>ATT</b> | <b>TA</b> | <b>BI</b> | <b>SQRT_AVE</b> |
|-------------|------------|-----------|-----------|-----------|-----------|-------------|------------|-----------|-----------|-----------------|
| <b>RWD</b>  | 1          | 0.559     | 0.677     | 0.617     | 0.635     | 0.552       | 0.698      | -0.443    | 0.707     | 0.923           |
| <b>UE</b>   | 0.559      | 1         | 0.592     | 0.730     | 0.504     | 0.611       | 0.604      | -0.166    | 0.532     | 0.901           |
| <b>AA</b>   | 0.677      | 0.592     | 1         | 0.630     | 0.659     | 0.603       | 0.728      | -0.278    | 0.797     | 0.895           |
| <b>FC</b>   | 0.617      | 0.730     | 0.630     | 1         | 0.671     | 0.787       | 0.732      | -0.276    | 0.594     | 0.805           |
| <b>PU</b>   | 0.635      | 0.504     | 0.659     | 0.671     | 1         | 0.713       | 0.875      | -0.347    | 0.716     | 0.916           |
| <b>PEOU</b> | 0.552      | 0.611     | 0.603     | 0.787     | 0.713     | 1           | 0.712      | -0.343    | 0.610     | 0.950           |
| <b>ATT</b>  | 0.698      | 0.604     | 0.728     | 0.732     | 0.875     | 0.712       | 1          | -0.460    | 0.801     | 0.902           |
| <b>TA</b>   | -0.443     | -0.166    | -0.278    | -0.276    | -0.347    | -0.343      | -0.460     | 1         | -0.469    | 0.860           |
| <b>BI</b>   | 0.707      | 0.532     | 0.797     | 0.594     | 0.716     | 0.610       | 0.801      | -0.469    | 1         | 0.973           |
